# Supplementary material
Source: Springer Nature journal article supplement (https://www.springermedizin.de/resource/supplementary/12874_2012_944_MOESM1_ESM.pdf/9433218)
Supplement: MOESM1 [file 9433218]

**Systematically reviewing and synthesising conversation analytic and related discursive research to inform healthcare communication practice and policy: An illustrated guide**

**Ruth H Parry and Victoria Land**

**ADDITIONAL FILE ONE:**

**Word groups used in electronic database searching in the Review of Future talk**

**Word group 1**

communicat\* OR interact\*

**Word group 2**

audio\* OR video\* OR discourse-analysis OR conversation-analysis OR sequential-analysis OR linguistic\*

**Word group 3**

prognos\* OR palliative OR end-of-life OR decision\* OR troubles

**Word group 4**

future

After searching on each of these word groups, results were then combined with the Boolean term AND

For the database PsycINFO, we added an additional group:

**Word group 5**

AND NOT biolog\* OR neuro\* OR gene\*
